# Supplementary material for: A bidentate borane as colorimetric fluoride ion sensor
Source: Royal Society of Chemistry journal article supplement (doi:10.1039/b403596h), 2004-01-01
Supplement: b403596h.doc [file b403596h.doc]

**Bidentate borane as colorimetric fluoride ion sensors**

Stéphane Solé and François P. Gabbaï

Chemistry Department

Texas A&M University 3255 TAMU

College Station, Texas 77843-3255

Fax: (1) 979-845-4719

E-mail: [gabbai@mail.chem.tamu.edu](mailto:gabbai@mail.chem.tamu.edu)

**Supplementary information**

**Computational details:** All calculations carried out on **3** were performed using the Gaussian 98 suite of programs (GAUSSIAN 98 (M. J. Frisch, G. W. Trucks, H. B. Schlegel, G. E. Scuseria, M. A. Robb, J. R. Cheeseman, V. G. Zakrzewski, J. A. Montgomery Jr., R. E. Stratmann, J. C. Burant, S. Dapprich, J. M. Millam, A. D. Daniels, K. N. Kudin, M. C. Strain, Ö. Farkas, J. Tomasi, V. Barone, M. Cossi, R. Cammi, B. Mennucci, C. Pomelli, C. Adamo, S. Clifford, J. Ochterski, G. A. Petersson, P. Y. Ayala, Q. Cui, K. Morokuma, P. Salvador, J. J. Dannenberg, D. K. Malick, A. D. Rabuck, K. Raghavachari, J. B. Foresman, J. Cioslowski, J. V. Ortiz, A. G. Baboul, B. B. Stefanov, G. Liu, A. Liashenko, P. Piskorz, I. Komáromi, R. Gomperts, R. L. Martin, D. J. Fox, T. Keith, M. A. Al-Laham, C. Y. Peng, A. Nanayakkara, M. Challacombe, P. M. W. Gill, B. Johnson, W. Chen, M. W. Wong, J. L. Andres, C. Gonzalez, M. Head-Gordon, E. S. Replogle, and J. A. Pople, *Gaussian 98* (Gaussian, Inc., Pittsburgh, PA, 1998). DFT calculations (full geometry optimization) were carried out by using the gradient-corrected Becke exchange functional (B3LYP) (A. D. Becke, *J. Chem. Phys.* **1993**,*98*, 5648) and the Lee-Yang-Parr correlation functional (C. Lee, W. Yang, R.G. Parr, *Physical Review B* **1988**,*37*, 785 and B. Miehlich, A. Savin, H.; Stoll, H. Preuss, *Chem. Phys. Lett.* **1989**,*157*, 200).

**Basis sets:** A 6-31+G* basis set was used for the boron and sulfur atoms. (T. Clark, J. Chandrasekhar, P.v.R. Schleyer,  *Comp. Chem.*  **1983**, *4*, 294; R. Krishnam, J.S. Binkley, R. Seeger, J.A. Pople *J. Chem. Phys.* **1980**,*72*, 650; P.M.W. Gill, B.G. Johnson, J.A. Pople and M.J. Frisch, *Chem. Phys. Lett.* **1992**,*197*, 499). A 6-31G basis set was used for all other carbon and hydrogen atoms (W.J. Hehre, R. Ditchfield, J. A. Pople, *J. Chem. Phys.* **1972**, 56, 2257). Following full optimization of the geometry of **3**, a frequency calculation was carried out and indicated the absence of imaginary frequencies.

**Cartesian coordinates for the optimized geometry of 3**

S 1 2.760498 0.681610 3.029343

C 2 1.779953 -0.770660 2.816483

C 3 1.696945 -1.504196 1.599869

C 4 0.924637 -2.699173 1.639847

C 5 0.253571 -3.122604 2.781281

C 6 0.319733 -2.347107 3.950943

C 7 1.078949 -1.182358 3.970718

H 8 1.155579 -0.599548 4.883972

H 9 -0.204956 -2.661942 4.847626

H 10 -0.320953 -4.042877 2.768311

H 11 0.863663 -3.298294 0.738953

B 12 2.494720 -1.112442 0.318878

C 13 2.432861 -2.083298 -0.931381

C 14 1.310852 -2.444977 -1.774582

C 15 1.431473 -3.655212 -2.561737

C 16 0.330963 -4.137787 -3.326935

C 17 -0.870239 -3.470734 -3.331055

C 18 -0.982971 -2.256134 -2.619339

C 19 0.070450 -1.681747 -1.888260

B 20 -0.208649 -0.157822 -1.568512

C 21 -1.721512 0.307388 -1.346954

C 22 -2.530945 -0.193222 -0.284332

C 23 -3.850494 0.255386 -0.118500

C 24 -4.433197 1.185120 -0.985184

C 25 -3.653275 1.656097 -2.048523

C 26 -2.324646 1.248688 -2.239182

C 27 -1.596832 1.825684 -3.441528

H 28 -2.303024 2.345673 -4.097122

H 29 -1.103592 1.052521 -4.040497

H 30 -0.824081 2.543198 -3.146637

H 31 -4.089783 2.358856 -2.754791

C 32 -5.849655 1.673584 -0.779327

H 33 -6.424240 0.981567 -0.154694

H 34 -6.377411 1.787964 -1.733124

H 35 -5.865067 2.653427 -0.282440

H 36 -4.436400 -0.138321 0.708862

C 37 -2.001007 -1.185852 0.727798

H 38 -2.809570 -1.563156 1.362305

H 39 -1.253769 -0.733521 1.390274

H 40 -1.520508 -2.041763 0.248093

C 41 0.892181 0.970413 -1.711304

C 42 1.732071 1.056610 -2.864929

C 43 2.575409 2.164810 -3.040970

C 44 2.659042 3.197037 -2.100784

C 45 1.844818 3.110092 -0.964493

C 46 0.963882 2.040298 -0.763611

C 47 0.103790 2.077942 0.487473

H 48 0.490356 2.820755 1.192352

H 49 0.082794 1.116241 1.008331

H 50 -0.933502 2.342667 0.254868

H 51 1.890671 3.898956 -0.217621

C 52 3.614822 4.352417 -2.287262

H 53 3.183197 5.293991 -1.929352

H 54 3.888474 4.481674 -3.339890

H 55 4.542618 4.185242 -1.722702

H 56 3.183700 2.220947 -3.940994

C 57 1.741287 0.019500 -3.975632

H 58 2.181656 0.443939 -4.883972

H 59 0.742081 -0.344467 -4.229492

H 60 2.335541 -0.859360 -3.701111

H 61 -1.923172 -1.719406 -2.675980

H 62 -1.718094 -3.850143 -3.892548

H 63 0.463013 -5.052505 -3.898636

C 64 2.645233 -4.396927 -2.583420

C 65 3.730545 -3.985458 -1.846268

C 66 3.607880 -2.844315 -1.024017

H 67 4.457443 -2.573547 -0.403610

H 68 4.663284 -4.540222 -1.867950

H 69 2.692764 -5.294006 -3.194336

C 70 3.578369 0.001892 0.413361

C 71 3.766129 0.794189 1.579239

C 72 4.782333 1.769714 1.650284

C 73 5.635162 1.971588 0.570221

C 74 5.475174 1.212967 -0.600586

C 75 4.463959 0.260757 -0.668549

H 76 4.334427 -0.308700 -1.580811

H 77 6.131271 1.374405 -1.449646

H 78 6.424240 2.714203 0.639435

H 79 4.906723 2.354645 2.557037

**Optimized geometry and atom numbering scheme of 3**

**Results of the time dependent DFT calculation carried out on 3.**

Excitation energies and oscillator strengths:

Excited State 1: Singlet 3.1946 eV 388.11 nm f=0.0492

150 ->152 0.11139

151 ->152 0.67235

Excited State 2: Singlet 3.3109 eV 374.47 nm f=0.1231

150 ->152 0.66058

151 ->152 -0.10372

Excited State 3: Singlet 3.4583 eV 358.51 nm f=0.0485

149 ->152 0.65402

149 ->153 -0.14572

151 ->153 -0.14913

**Synthetic details**

**General Considerations.** Tetrakis(THF)lithium dimesityl-1,8-naphthalenediylborate was synthesized by following a published procedure (Hoefelmeyer, J. D.; Gabbaï, F. P. *Organometallics* **2002**, *21*, 982-985). TMEDA, Me3SiF2S(NMe2)3 and trimethylchlorosilane were purchased from Aldrich, diphenylsulfide from TCI America, boron tribromide and n-butyllithium (2.87 M in hexanes) from Alpha Aesar. All these compounds were used without purification. Solvents were dried by reflux under N2 over drying agents, and freshly distilled prior to use. Dichloromethane was dried over CaH2. Diethylether and THF were dried over Na/K. Air-sensitive compounds were handled under N2 atmosphere using standard Schlenk and glovebox techniques. UV-vis spectra were recorded on a JASCO V-530 spectrophotometer. Elemental analyses were performed at Atlantic Microlab (Norcross, GA). All melting points were measured on samples in sealed capillaries and are uncorrected**.**

**NMR spectroscopy:** NMR spectra were recorded on a Varian Unity Inova 400 FT NMR spectrometer (399.63 MHz for 1H, 376.03 MHz for 19F, 128.22 MHz for 11B, 100.50 MHz for 13C) by using internal deuterium lock. Chemical shifts ** are given in ppm, and are referenced against external Me4Si (H, 13C), BF3·Et2O (11B), and CFCl3 (19F).

**Crystallography.** The crystallographic measurements were performed using a Siemens SMART-CCD area detector diffractometer, with a graphite-monochromated Mo-K radiation (** = 0.71069 Å). Specimens of suitable size and quality were selected and mounted onto glass fiber with apiezon grease. The structures were solved by direct methods, which successfully located most of the non-hydrogen atoms. Subsequent refinement on *F*2 using the SHELXTL/PC package (version 5.1) allowed location of the remaining non-hydrogen atoms. Further crystallographic details can be found in table 1.

Bis-(2-trimethylsilylphenyl)sulfide (1).A 2.87 M solution of n-butyllithium in hexanes (47 mL, 134 mmol) was added dropwise to a solution of diphenylsulfide (10 g, 53.7 mmol) and TMEDA (30.2 mL, 134 mmol) in diethylether (100 mL) at -78ºC. The reaction mixture was allowed to warm to room temperature and stirred overnight. Trimethylchlorosilane (17 mL, 134 mmol) was then added at -78ºC and the mixture was stirred for one hour at room temperature before hydrolysis with 150 mL of a 1 M HCl solution. The layers were separated and the water layer was extracted with 100 mL of diethylether. The organic phases were combined, dried over anhydrous magnesium sulfate and filtered. The solvent was evaporated to yield 16.8 g (95%) of a crude oil. This compound was used without further purification. 1H NMR (CDCl3): 0.44 (s, 18H, C*H*3), 7.09 (m, 2H, C*H*), 7.24 (m, 4H, C*H*), 7.56 (m, 2H, C*H*). 13C NMR (CDCl3): -0.10 (6C, *C*H3), 126.0, 130.0, 131.8, 135.0 (8C, *C*H), 141.9, 143.5 (4C, S-*C* and Si-*C*).

10-Bromo-9-thia-10-boranthracene (2). A solution of boron tribromide (4.3 mL, 45.3 mmol) in dichloromethane (10 mL) was added dropwise under nitrogen to a solution of **1** (5 g, 15.1 mmol) in dichloromethane (40 mL). This reaction mixture was allowed to warm to room temperature and stirred for one hour. The solvent was evaporated and the resulting solid was extracted with diethylether (20 mL). This solution was filtered and **2** cristallized while standing at -50ºC. The solvent was removed by filtration and the crystals were washed with cold diethylether (2 times 20 mL) and dried under vacuum. Yield: 2.41 g (58%). mp. 145ºC. 1H NMR (CDCl3): 7.47 (ddd, 2H, 3*J*(H,H) = 6.8 Hz, 3*J*(H,H) = 8.0 Hz, 4*J*(H,H) = 1.6 Hz, HC-C*H*), 7.66 (ddd, 2H, 3*J*(H,H) = 6.8 Hz, 3*J*(H,H) = 8.0 Hz, 4*J*(H,H) = 1.6 Hz, HC-C*H*), 7.71 (ddd, 2H, 3*J*(H,H) = 8.0 Hz, 4*J*(H,H) = 1.6 Hz, 5*J*(H,H) = 0.8 Hz, SC-C*H*), 8.75 (ddd, 2H, 3*J*(H,H) = 8.0 Hz, 4*J*(H,H) = 1.6 Hz, 5*J*(H,H) = 0.8 Hz, BC-C*H*). 13C NMR (CDCl3): 125.1, 125.2, 132.7, 139.6 (8C, *C*H), 144.3 (2C, S-*C*). B-*C* not detected. 11B NMR (CDCl3): +54.5.

Diborane 3. A solution of **2** (1 g, 3.58 mmol) in diethylether (40 mL) was added to a suspension of tetrakis(THF)lithium dimesityl-1,8-naphthalenediylborate (2 g, 2.98 mmol) in diethylether (40 mL) at 25ºC. The mixture was stirred two hours at room temperature and the solution was filtered. The solvent was removed under vacuum and the resulting solid was extracted with dichloromethane (20 mL). Following filtration and evaporation of the solvent, the yellow solid was washed with ethanol (two times 50 mL) and dried under vacuum to yield 1.16 g (68%). mp. 279ºC. 1H NMR (CDCl3): 1.01 (s, 3H, Mes-C*H*3), 1.26 (s, 3H, Mes-C*H*3), 1.41 (s, 3H, Mes-C*H*3), 1.72 (s, 3H, Mes-C*H*3), 1.76 (s, 3H, Mes-C*H*3), 2.18 (s, 3H, Mes-C*H*3), 5.91 (s, 1H, Mes-C*H*), 6.04 (s, 1H, Mes-C*H*), 6.54 (s, 1H, Mes-C*H*), 6.62 (s, 1H, Mes-C*H*), 6.96 (ddd, 1H, 3*J*(HH) = 7.2 Hz, 3*J*(HH) = 8.0 Hz, 4*J*(HH) = 1.6 Hz, C*H*), 7.02 (ddd, 1H, 3*J*(HH) = 6.4 Hz, 3*J*(HH) = 8.0 Hz, 4*J*(HH) = 1.6 Hz, C*H*), 7.28 (ddd, 1H, 3*J*(HH) = 7.6 Hz, 4*J*(HH) = 1.6 Hz, 5*J*(HH) = 0.4 Hz, C*H*), 7.37-7.54 (m, 6H, C*H*), 7.68 (ddd, 1H, 3*J*(HH) = 7.6 Hz, 4*J*(HH) = 1.6 Hz, 5*J*(HH) = 0.4 Hz, C*H*), 7.79 (dd, 1H, 3*J*(HH) = 6.8 Hz, 4*J*(HH) = 1.6 Hz, C*H*), 7.99 (dd, 1H, 3*J*(HH) = 8.0 Hz, 4*J*(HH) = 1.6 Hz,C*H*), 8.13 (dd, 1H, 3*J*(HH) = 8.4 Hz, 4*J*(HH) = 1.6 Hz,C*H*). 13C NMR (CDCl3): 20.99, 21.08, 22.21, 23.23, 23.30, 25.16 (6C, Mes-*C*H3), 123.3, 124.1, 124.2, 124.3, 125.0, 125.5, 127.6, 127.8, 129.2, 129.5, 129.7, 129.8, 130.8, 133.9, 139.4, 139.5, 141.8 (18C, *C*H), 132.5, 132.9, 138.1, 144.1, 144.9, 147.9 (6C, B-*C*), 133.9, 137.7, 139.1, 140.8, 140.9, 141.1, 144.0, 144.4, 145.0 (10C, C-*C*). 11B NMR (CDCl3): +56.1, +73.8. Anal. Calcd for C40H36B2S: C 84.23; H 6.36. Found: C 84.14; H 6.40.

Fluoride complex of **3**: [**3**•*2*-F]-[S(NMe2)3]+: To a solution of **3** (100 mg, 0.17 mmol) in THF (5 mL) at 25ºC, was added Me3SiF2S(NMe2)3 (43 mg, 0.16 mmol) in 5 mL of THF. After 15 minutes, the solvent was evaporated and the residue was washed with two portions of diethylether (20 mL). The remaining white solid was dried under vacuum yielding 106 mg (90%). Large colorless monocrystals could be obtained by slow evaporation of a THF solution. mp. 235ºC. 1H NMR (C2D6O): 0.95 (s, 3H, Mes-C*H*3), 1.57 (br, 3H, Mes-C*H*3), 1.67 (s, 6H, Mes-C*H*3), 1.92 (s, 3H, Mes-C*H*3), 2.06 (s, 3H, Mes-C*H*3), 2.96 (s, 18H, NC*H*3), 5.76 (s, 1H, Mes-C*H*), 6.04 (s, 1H, Mes-C*H*), 6.29 (t, 1H, 3*J*(HH) = 7.6 Hz, C*H*), 6.39 (s, 1H, Mes-C*H*), 6.40 (m, 1H, C*H*), 6.42 (s, 1H, Mes-C*H*), 6.66 (m, 2H, C*H*), 6.78 (t, 1H, 3*J*(HH) = 7.6 Hz, C*H*), 6.93 (t, 1H, 3*J*(HH) = 7.6 Hz, C*H*), 7.01 (m, 2H, C*H*), 7.10 (m, 2H, C*H*), 7.24 (m, 2H, C*H*), 7.64 (m, 2H, C*H*). 13C NMR (C2D6O): 20.77 (s, 2C), 24.41 (s, 2C), 25.04 (s, 1C), 25.38 (d, 1C, J(CF) = 7.2 Hz) (Mes-*C*H3), 38.37 (s, 6C, N*C*H3), 123.6 (s), 123.7 (s), 123.9 (s), 124.1 (s), 124.3 (s), 124.6 (s), 124.9 (s), 125.3 (s), 125.8 (d, J(CF) = 2.0 Hz), 126.5 (s), 128.1 (s), 128.5 (s), 128.9 (s), 129.5 (s), 129.8 (d, J(CF) = 8.8 Hz), 130.0 (d, J(CF) = 6.8 Hz), 136.9 (d, J(CF) = 2.0 Hz), 138.0 (d, J(CF) = 2.0 Hz) (18C, *C*H), 132.8 (s), 133.5 (s), 139.3 (s), 140.5 (d, J(CF) = 4.9 Hz), 140.6 (s), 140.7 (s), 141.9 (d, J(CF) = 6.0 Hz), 142.5 (s), 144.9 (s) (10C, C-*C*), 143.8, 146.4, 147.2, 150.3, 150.9, 154.9 (6C, B-*C*). 11B NMR (C2D6O): +12.3, +17.1. 19F NMR (C2D6O): -188.7. Anal. Calcd for C46H54N3B2S2F: C 73.31; H 7.22; N 5.58. Found: C 72.41; H 7.20; N 5.52.

**UV-vis titration experiment:**

All UV/Vis absorption spectra and spectrophotometric measurements were recorded on a JASCO V530 UV/Vis spectrometer.

**Experiment 1: Titration of Mes3B with F-**

Derivation of the fluoride titration isotherm

A solution of Mes3B(3 mL, 5 10-5 M) was placed in the cell and was titrated with incremental amounts of fluoride anions by addition of a solution of nBu4NF in THF (6 10-3 M). The absorption was monitored at max = 331 nm ( = 15500). In fitting the experimental points, a correction was applied in order to account for the residual absorbance caused by a low level of impurity in the nBu4NF.

| Mes3B | + | F- |  | Mes3BF |
| --- | --- | --- | --- | --- |
| Mes3B0 – x |  | F0 – x |  | x |

KMes3B = Mes3BF/(Mes3B*F) = x/((Mes3B0 – x) * (F0 – x)

=> x2 – x (Mes3B0 + F0 + 1/KMes3B) + Mes3B0 * F0 = 0

=> x = {(Mes3B0 + F0 + 1/ KMes3B) – [(Mes3B0 + F0 + 1/ KMes3B)2 – 4 * Mes3B0 * F0]1/2}/2

=> Abscalc = (Mes3B0 – x) *  + constant * F0 This term is added to account for the residual absorbance caused by a low level of impurity in the [NBu4]+[F]- solution (constant = 400).

The experimental data was fitted by hand to the above equation (Mes3B0 = 5 10-5 M). This fit yielded KMes3B = 3.3 (0.4) 105 M-1.

| F0 in mol/L | Abs calc | Abs exp |
| --- | --- | --- |
| 0 | 7.75E-01 | 0.77935 |
| 1.25E-05 | 5.99E-01 | 0.63366 |
| 2.49E-05 | 4.34E-01 | 0.44751 |
| 3.73E-05 | 2.91E-01 | 0.28934 |
| 4.96E-05 | 1.88E-01 | 0.18337 |
| 6.19E-05 | 1.30E-01 | 0.13697 |
| 7.41E-05 | 1.01E-01 | 0.10643 |
| 8.62E-05 | 8.78E-02 | 0.08808 |
| 9.84E-05 | 8.14E-02 | 0.07946 |
| 0.00011 | 7.88E-02 | 0.07568 |
| 0.000122 | 7.83E-02 | 0.07262 |
| 0.000134 | 7.92E-02 | 0.07246 |
| 0.000146 | 8.10E-02 | 0.07051 |

Plot: experimental points (square) and best theoretical fit (line)

y axis: Abs; x axis: F0 in mol/L

**Experiment 2: Titration of 3 with F- in the presence of a tenfold excess of Mes3B**

A solution (3 mL) of Mes3B **(**5 10-4 M) and **3** (4.15 10-5 M) and was placed in the cell and was titrated with incremental amounts of fluoride anions by addition of a solution of nBu4NF in THF (6 10-3 M). The absorption was monitored at  = 390 nm ( = 8600).

Derivation of the fluoride titration isotherm

| **3** | + | Mes3B | + | 2F |  | **3**F | + | Mes3BF |
| --- | --- | --- | --- | --- | --- | --- | --- | --- |
| **3**0 – x |  | Mes3B0 – y |  | F0 – x – y |  | x |  | y |

K**3** = **3**F/(**3***F) = x/[( **3**0 – x) * (F0 – x – y)]

KMes3B = Mes3BF/(Mes3B*F) = y/[(Mes3B0 – y) * (F0 – x – y)]

=> Krel = K**3**/KMes3B = [x * (Mes3B0 – y)]/ [y * ( **3**0 – x)]

This experiment is carried out with a tenfold excess of Mes3B.

The fluoride association constant for both Mes3B and the diborane **3** are high.

=> As a result, the following approximation can be made: F0 = x + y

=> Krel = K**3**/KMes3B = [x * (Mes3B0 – F0 + x)]/ [(F0 - x) * (**3**0 – x)]

=> x2 * (Krel – 1) – x * [(Krel * (**3**0 + F0)) + Mes3B0 - F0] + Krel ***3**0 *F0 = 0

a -b c

=> x = [-b – (D)1/2]/2a with D = b2 -4ac

=> Abscalc = (**3**0 – x) * 

The experimental data was fitted by hand to the above equation (**3**0 = 4.15 10-5 M, Mes3B0 = 5 10-4 M). This fit yielded Krel > 1.5 104. Since KMes3B = 3.3 (0.4) 105 M-1 => K**3** > 5 109

| F0 in mol/L | Abs calc | Absexp at 390 nm |
| --- | --- | --- |
| 0 | 0.35204 | 0.3569 |
| 2.9985E-06 | 0.33086 | 0.330957 |
| 7.98935E-06 | 0.29429 | 0.287784 |
| 1.29719E-05 | 0.25231 | 0.244699 |
| 1.79462E-05 | 0.20852 | 0.201712 |
| 2.29122E-05 | 0.15911 | 0.158843 |
| 2.78699E-05 | 0.1148 | 0.116142 |
| 3.28195E-05 | 0.07226 | 0.073776 |
| 3.52912E-05 | 0.04656 | 0.052906 |
| 3.77608E-05 | 0.02861 | 0.032687 |
| 4.02285E-05 | 0.01168 | 0.01494 |
| 4.2694E-05 | 0.00334 | 0.005383 |
| 4.51576E-05 | 0.00155 | 0.002667 |
| 4.7619E-05 | 0.00111 | 0.001712 |
| 5.25359E-05 | 0.00137 | 0.000979 |
| 5.74447E-05 | 0.0012 | 0.000679 |
